# Supplementary material
Source: MDPI journal article supplement (https://www.mdpi.com/1999-4907/13/11/1829)
Supplement: s1 [file s1]

# PLAN OCHRONY PARKU NARODOWEGO "BORY TUCHOLSKIE"

Operat  
ochrony walorów kulturowych  
(Kultur)

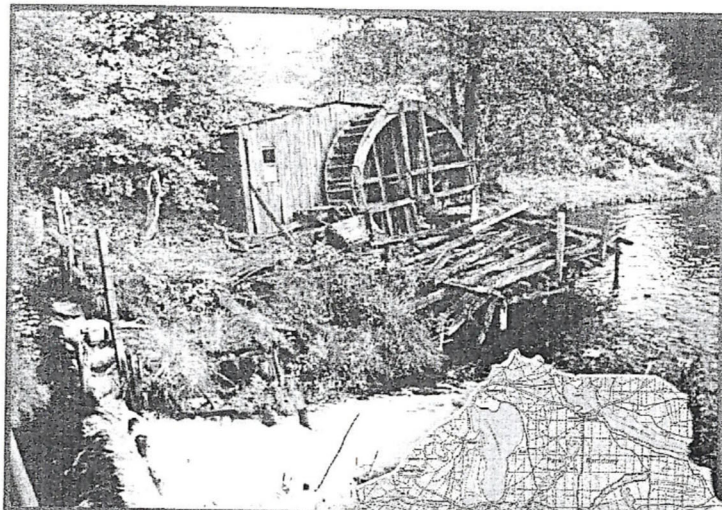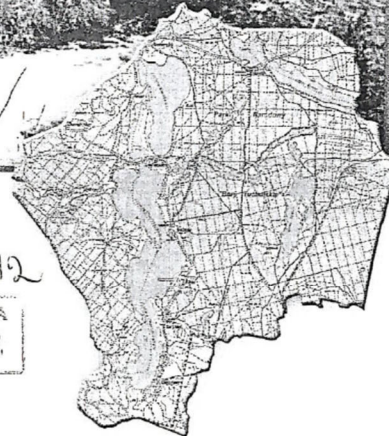

2305 / 112

BIBLIOTEKA  
Parku Narodowego  
"Bory Tucholskie"

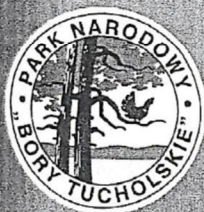

Warszawa, 2000 — 2003

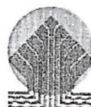

Praca sfinansowana  
ze środków NFOŚiGW

**proeko**

BIURO PROJEKTÓW I WDROŻEŃ PROEKOLOGICZNYCH

80-354 Gdańsk, ul. Ziemowita 19 tel./fax (058) 558-40-10 e-mail: proeko@gdansk.supermedia.pl NIP 584-102-76-55

## **PLAN OCHRONY PARKU NARODOWEGO „BORY TUCHOLSKIE”**

### **OPERAT OCHRONY WALORÓW KULTUROWYCH**

**autorzy:**

dr inż. arch. Bogna Lipińska - kierownik zespołu

mgr Danuta Król

mgr Regina Pernak

dr hab. Maciej Przewoźniak - konsultacje i weryfikacja

**Gdańsk 2000 - 2002**

## Spis treści:

|                                                                                                                                                                                                                         |     |
|-------------------------------------------------------------------------------------------------------------------------------------------------------------------------------------------------------------------------|-----|
| Wstęp – cele ochrony walorów kulturowych PNBT i jego otuliny .....                                                                                                                                                      | 4   |
| 1. Analiza stanu wiedzy na temat środowiska kulturowego PNBT i jego otuliny .....                                                                                                                                       | 6   |
| 1.1. Zestawienie przydatności materiałów archiwalnych .....                                                                                                                                                             | 9   |
| 1.2. Bibliografia .....                                                                                                                                                                                                 | 10  |
| 1.3. Zestaw reprodukcji archiwalnego materiału kartograficznego .....                                                                                                                                                   | 12  |
| 2. Zarys historii osadnictwa obszaru .....                                                                                                                                                                              | 16  |
| 2.1. Warunki naturalne i ich wpływ na charakter gospodarki .....                                                                                                                                                        | 16  |
| 2.2. Osadnictwo i gospodarka .....                                                                                                                                                                                      | 16  |
| 2.3. Komunikacja .....                                                                                                                                                                                                  | 18  |
| 3. Katalog zasobów kulturowych PNBT i jego otuliny .....                                                                                                                                                                | 25  |
| 3.1. Zasób archeologiczny .....                                                                                                                                                                                         | 25  |
| 3.2. Struktury osadnicze, historyczne struktury użytkowania terenu, zieleni komponowana .....                                                                                                                           | 54  |
| 3.2.1. Szczegółowy opis struktur osadniczych, historycznych struktur użytkowania terenu, zieleni komponowanej oraz innych układów przestrzennych pochodzenia kulturowego znajdujących się na terenie PNBT .....         | 54  |
| 3.2.2. Szczegółowy opis struktur osadniczych, historycznych struktur użytkowania terenu, zieleni komponowanej oraz innych układów przestrzennych pochodzenia kulturowego znajdujących się na terenie otuliny PNBT ..... | 56  |
| 3.3. Obiekty budowlane .....                                                                                                                                                                                            | 57  |
| 3.4. Katalog i dokumentacja fotograficzna elementów środowiska kulturowego PNBT .....                                                                                                                                   | 58  |
| 3.5. Etnografia .....                                                                                                                                                                                                   | 128 |
| 3.6. Dziedzictwo niematerialne. Tradycje i historyczne formy gospodarki leśnej .....                                                                                                                                    | 128 |
| 3.6.1. Formy gospodarki i tradycje zajęć ludności .....                                                                                                                                                                 | 128 |
| 3.6.2. Toponimia .....                                                                                                                                                                                                  | 130 |
| 4. Waloryzacja zasobów kulturowych .....                                                                                                                                                                                | 134 |
| 4.1. Waloryzacja porównawcza obiektów w zakresie obszaru planu .....                                                                                                                                                    | 134 |
| 4.1.1. Zespoły przestrzenne, architektura i budownictwo .....                                                                                                                                                           | 134 |
| 4.1.2. Archeologia .....                                                                                                                                                                                                | 135 |
| 4.1.3. Waloryzacja zbiorcza .....                                                                                                                                                                                       | 137 |
| 4.2. Strefowanie obszaru PNBT i jego otuliny w zakresie kompleksowej waloryzacji kulturowej .....                                                                                                                       | 138 |
| 4.3. Waloryzacja na tle regionalnym i ogólnopolskim .....                                                                                                                                                               | 139 |
| 5. Identyfikacja zagrożeń środowiska kulturowego .....                                                                                                                                                                  | 141 |
| 6. Zewnętrzne przesłanki ochrony dziedzictwa kulturowego .....                                                                                                                                                          | 144 |
| 7. Ogólne i szczegółowe cele ochrony dziedzictwa kulturowego .....                                                                                                                                                      | 145 |
| 7.1. Cele ogólne .....                                                                                                                                                                                                  | 145 |
| 7.2. Cele szczegółowe .....                                                                                                                                                                                             | 145 |



### 3.5. Etnografia

Obszar zajmowany przez dzisiejszy PNBT, leży w rejonie, którego historia toczyła się specyficznie. Przede wszystkim był to teren pogranicza. W rejonie tym przebiegała bowiem jedna z umownych granic Pomorza Nadwiślańskiego. Interesujące nas granice Pomorza Nadwiślańskiego (południowa i zachodnia) zostały określone przez naukowców następująco:

- granica południowa: granicę tę można umownie wyznaczyć na wysokości pasa leśnego Borów Tucholskich dochodzących do Wisły w rejonie Nowego. W średniowieczu obszary międzyplemienne pozostawiano bowiem nietknięte (nie wylesione) lub nawet celowo pozwalano zarastać im lasami.

- granica zachodnia: granicę tę najtrudniej wyznaczyć, przyjęto tu pomocniczo przebieg działów wodnych rzek Redy, Raduni, Wierzyca i Wdy.

Jak z tego widać, granica zachodnia Pomorza Nadwiślańskiego przebiegała jeszcze nieco bardziej na wschód od obecnego PNBT i jego otuliny. Była to również granica jednego z regionów etnograficznych Pomorza, a mianowicie Kociewia. Jeden z badaczy-etnografów (S. Bystron) Kociewie lokalizuje między rzekami Czarna Woda, Wisła i Wierzyca z tym, że na obszarze od Zblewa po Kiszewę, Czersk i Jezioro Wdzydzkie wyodrębnia grupę tzw. Lasaków, którą określa się jako przejściową między Kociewiakami a Kaszubami. Inny podział wprowadził następny badacz (J. Gajek), który lokalizuje Kociewie na zachód od linii Starogard-Skórcz-Osiek (tzw. Kociewie właściwe) oraz na pozostałym terenie ciągnącym się pod Czersk, Starą Kiszewę, Nową Karczmę ku Gdańskowi, zaś na obszarach nadwiślańskich od Świecia do Tczewa i Pruszcza Gdańskiego (zw. Kociewie Wielkie). W obrębie Kociewia znajdowały się drobniejsze grupy etniczne, jak: Górale, Feteracy, Polanie, Olędry oraz Lesaki, Kidlonie i Lasacy.

Reasumując, według etnografów interesujący nas teren nie należał do Kociewia lecz stanowił odrębne dwie jednostki etniczne, a mianowicie Zabory (okolice Charzykowych i Brus) oraz Kosznajdry (między Chojnicami a Tucholą). Szczegółowo opisując, interesujący nas obszar nazywany był i jest do tej pory Zaborami bądź Ziemią Zaborską z tym, że większa część tego terytorium położona była na wschód od dzisiejszych granic otuliny PNBT.

### 3.6. Dziedzictwo niematerialne. Tradycje i historyczne formy gospodarki leśnej

#### 3.6.1. *Formy gospodarki i tradycje zajęć ludności*

Do najistotniejszych wartości niematerialnych tego terenu należy wielowiekowa tradycja gospodarki leśnej. W jej ramach znajduje się także tradycja łowiectwa, przetwórstwa, a także zbieractwa. Ważna jest także tradycja wykorzystywania cieków i ich siły napędowej w budowaniu od najwcześniejszych czasów miejscowego przemysłu - młynów, tartaków, foluszy, itp.

Położenie interesujących nas miejscowości w pobliżu ogromnych kompleksów leśnych, bądź nawet niektórych osad w ich głębi, zaowocowało powstaniem paru ciekawych legend. Między innymi o folwarku krzyżackim, który został opuszczony lub zlikwidowany

przez właścicieli z powodu nieustannych „najazdów” miejscowej „puszczańskiej” ludności, która nie życzyła sobie nieproszonego sąsiada. Z podobnego powodu, nie ostał się w miejscowości Swomegacie klasztor Augustianów, którzy zmuszeni byli swe dobra odstąpić.

W zakresie gospodarki leśnej interesująca jest niezwykła trwałość tutejszych lasów, które były przez bardzo długie okresy czasu cenionymi i szanowanymi kompleksami przyrodniczymi. Były też okresy rabunkowej gospodarki. Największe wylesienia na tym terenie miały miejsce w okresie XVII-XVIII w na obszarach położonych na północ od granic dzisiejszego PNBT. Prowadzono wówczas przez ponad sto lat silną eksploatację lasów. Wycięto między innymi bardzo dużo cisów często spotykanych na tym terenie, których drewno tak potrzebne było w tym czasie do budowy okrętów. Jednak już w XIX wieku rozpoczęto zalesianie powstałych polan. Gospodarka leśna zaczęła być prowadzona w zgodzie z ochroną przyrody. Dzięki temu ów piękny leśny zespół przyrodniczy przetrwał do dzisiejszych czasów.

Miejscowe lasy były zarówno w zarządzie państwowym jak i poszczególnych, pobliskich dużych majątków ziemskich. Fragment lasu należał także do miasta Chojnice. Jak wynika z analizy archiwalnego materiału kartograficznego, tereny leśne były pocięte odpowiednimi przesiekami, posiadały optymalnie umiejscowione leśniczówki i gajówki, wygodne i malowniczo poprowadzone drogi leśne, „wędrujące” bindugi - miejsca do spławiania pozyskanego z borów drewna. Podstawowa, najczęstsza trasa spławu drewna wiodła szlakiem Brdy - od Sapolna do Jeziora Charzykowskiego, Karsieńskiego, Łackiego, jezior Dybrz (Drzewicz), Kosobudno do Myłofa, gdzie kończył się pierwszy etap spławu. Dalej drewno wieziono kolejką wąskotorową do Rytla, a stąd do Bydgoszczy i dalej do Gdańska. Wiadomo, iż w Myłofie część drewna zatoneła, ostatnio jako dobro „niczyje” zaczęła wydobywać je prywatna firma. Najczęściej uruchamiane bindugi zlokalizowane były w: Drzewiczu (czynna do ok. 50-tych lat XX w., ostatnio sporadycznie), przy Jeziorze Charzykowskim na polu namiotowym w rejonie ujścia jez. Mielnica, od czasu do czasu także na północ od miejscowości Bachorze. Tak zwane jeziorne bindugi wykorzystywano zimą, kiedy to na zamarznętej tafli jeziora rzucono pnie i czekano na wiosenne roztopy i potem spławiano jeziorami, rzeką Brdą do wspomnianej miejscowości Myłof. Warto zaznaczyć, iż nazwa binduga miała swój odpowiednik w miejscowym języku i miejsca takie zwano także „aplaga”.

Wspomnienie tych elementów rozmyślnie umieszczono w rozdziale dziedzictwo niematerialne, gdyż swoją formą – materialną – są świadectwem niematerialnej bardzo cennej, na wysokim poziomie cywilizacyjno-kulturowym myśli planistycznej, przyrodniczej i gospodarczej, mającej na względzie zarówno dobro człowieka jak i przyrody.

Warto także wspomnieć o dwóch tradycjach, po których dzisiaj ślady materialne zachowały się w postaci reliktovej, nie do końca zrozumiałej dla współczesnego obserwatora.

Pierwszą z nich jest dawna produkcja szkła w okolicy Jez. Głuchego, w pobliżu dzisiejszej leśniczówki Chociński Młyn oraz w miejscowości Zielona Huta (na historycznych mapach widnieje wprost nazwa „Glashütte” oraz oznaczenie cegielni – wydobywanie glinek). Jeszcze przed II-gą wojną światową można było na łąkach nad Jezioro Głuchym wśród trawy znaleźć kawałki różnokolorowych szkielek. Dzisiaj teren ten jest porośnięty całkowicie lasem.

Drugim interesującym elementem będącym śladem przypadkowego (?) wydarzenia jest skład gatunkowy tzw. „Lasu Francuskiego”. Otóż na pewnym obszarze dzisiejszego Lasu Chocińskiego (wokół małego jeziora Kosioł, na wschód od jez. Jeleń i Zielone) wzrosły



nietypowe odmiany drzew leśnych - różne odmiany sosny. Jest to – według tradycji - efekt pewnego zlecenia dla łuszczarni szyszek w Klosnowie na zamówienie firmy francuskiej. Część nasion z przywiezionego przez Francuzów materiału zawędrowała na zewnątrz i w ten sposób pojawił się nietypowy w tym terenie drzewostan.

### 3.6.2. Toponimia

W zakresie wartości niematerialnych na uwagę zasługują także istniejące i zanikające nazwy miejscowe, które posiadają niejednokrotnie interesujące pochodzenie, związane z imieniem właściciela, miejscowymi charakterystycznymi cechami form krajobrazowych bądź pojedynczymi elementami środowiska przyrodniczego i nawiązującymi na przykład do ich kształtu, tradycyjnego sposobu użytkowania bądź jakiegoś wydarzenia.

Na podstawie istniejących opracowań oraz archiwalnego materiału kartograficznego a także na podstawie wywiadów miejscowych wykonanych w trakcie badań terenowych otrzymano następujące podstawowe informacje dla nazw występujących na interesującym nas terenie PNBT i jego otuliny oraz dla ciekawszych nazw miejsc położonych w bezpośrednim sąsiedztwie.

#### Nazwy osad i miejsc:

- „**Ameryka**” – nazwa rejonu w lasach, okolica w lesie, gdzie dawniej założono jedną z osad leśnych; nazwa niezidentyfikowana, najprawdopodobniej związana z nagłym zapotrzebowaniem rąk do pracy przy wyrąbie lasu w tym rejonie;
- „**Babilon**” – nazwa miejscowości; być może nazwa od zniemczonej nazwy (kalki) „**Babie Łąki**” = „**Babilonke**” i stąd później „**Babilon**”;
- „**Bachorze**” – nazwa miejscowości i miejsca najczęstszego spławiania drewna (bindugi); nazwa topograficzna od słowa „**bachorze**” – **moczary**;
- „**Barłąka**” – cypel nad Jeziorem Łackim; nazwa niezidentyfikowana, być może pochodzi od imienia właściciela obszaru;
- „**Borne**” – nazwa osady leśnej; nazwa topograficzna od słowa „**borny**” = „**borowy**”, człowiek związany z lasem i gospodarką leśną;
- „**Charzykowy**” – miejscowość; nazwa sekundarna, dzierżawcza od nazwy osobowej **Charzyk**; nazwa niemiecka: *Muskendorf* – nazwa dzierżawcza od nazwy osobowej **Misko**, **Misiek**, **Misik** co może oznaczać **Michael**, **Mychael** – zaś *dorf* – **wieś**.
- „**Chociński Las**” – nazwa obszaru w okolicach jezior Małe i Wielkie Gacno – jest to ślad po wprowadzonej najprawdopodobniej przez Niemców nazwie dla całości dzisiejszego obszaru PNBT – „**Las Chociński Młyn**” („*Forst Chotzen-mühl*”), jako że włączono ten obszar w rewir należący do nadleśnictwa w Chocińskim Młynie;
- „**Chociński Młyn**” – nazwa miejscowości; interesujące jest to, że funkcjonowała dla tego miejsca także nazwa „**Stary Most**” od zawsze istniejącego tu mostu na rzece Chocinie w miejscu gdzie przekraczał ją historyczny trakt;
- „**Chojniczki**” – nazwa miejscowości; nazwa sekundarna od nazwy rzeki **Chojnica**;
- „**Francuski Las**” – część „**Chocińskiego Lasu**” w rejonie jezior Jeleń i Zielone wokół jez. Kosioł, nazwa używana bardzo rzadko i jedynie w mowie potocznej, pochodzi według

tradycji od zdarzenia wysiania się nasion z szyszek sosnowych obcych odmian dostarczonych niegdyś przez firmę francuską do łuszczarni w Klosnowie;

- „**Funka**” – nazwa miejscowości i miejsca; nazwa pochodzenia niemieckiego, dzierżawcza od nazwy osobowej „**Funk**” – nazwiska mieszkańca – Niemca, najprawdopodobniej założyciela i właściciela tutejszego dawnego młyna gdyż miejsce to nazywało się także „*Funkenmal*”, „*Funkermiel*”, „*Funkermühl*”, „*Funkemel*” a także po polsku „*Funka - młyn*”, co jest jednoznaczne z istnieniem tu zakładu młyńskiego; miejsce nazywane było także „*Młyn Charzykowski*”;
- „**Góra Zamkowa**” - grodzisko na półwyspie na Jez. Charzykowskim, także „*Wały Zamkowe*”;
- „**Glabus**” – łąka na zachodnim brzegu Jez. Ostrowite; nazwa prymarna, dzierżawcza od nazwy osobowej **Glabus**, która może być przezwiskiem od „**globus**” (??); miejscowość której był właścicielem lub mieszkańcem ów „**Globus**”, nie istnieje;
- „**Józefowo**” – gajówka – dawniej „*Josephsberg*” a także wcześniej „*Josephsbruch*” – interesujące zmiany w nazwie: najbardziej adekwatna nazwa to „*Josephsbruch*” – „**Józefowe Bagna**” gdyż siedlisko znajduje się na podmokłym terenie, natomiast zmiana na „*Josephsberg*” – „**Józefowa Górka**” nastąpiła prawdopodobnie wówczas gdy budując wspomnianą gajówkę wzniesiono sztuczny pagórek (podobnie jak na podmokłych terenach żuławskich); dzisiaj w nazwie pozostało jedynie „**Józefowo**”;
- „**Klosnowo**” – nazwa miejscowości, folwarku przemysłowego; substytucja fonetyczna nazwy niemieckiej dzierżawczej „*Klausenau*” od nazwy osobowej **Klaus** – **Mikołaj**; oznacza miejsce będące własnością Mikołaja;
- „**Kopernica**” – nazwa miejscowości; polska „kalka” dawnej nazwy „*Kupfer Muhle*” (Miedziowy Młyn) jak często nazywano młyński zakład przemysłowy w którym produkowano (mielono składniki) proch strzelniczy; nazwa często spotykana dla osad młyńskich, np. w Dolinie Radości w Gdańsku-Oliwie w zespole młynów pocysterskich także jeden z młynów nazywał się „*Młyn Prochowy*”; przekształcona z czasem na „*Kupernicę*” i następnie na „*Kopernicę*”;
- „**Kosobudno Dwór**” – nazwa nieistniejącej zagrody gburskiej położonej nad jez. Kosobudno; właściwie winno być „*Kosobudno Wybudowanie*”;
- „**Krowie Łąki**” – na południe od jez. Welsyk (koło większego jez. Witoczno); nazwa związana z formą użytkowania obszaru;
- „**Łukomie**” – nazwa osady dawnej leśniczówki; nazwa sekundarna, dzierżawcza od nazwy osobowej **Łukom** – co oznacza **Lukasz**;
- „**Myłoj**” – interesująca „kalka” polska nazwy oryginalnej „*Muhlhof*” a zatem „*Młyński Dwór*” lub zagroda młynarza.
- „**Nowy Młyn**” – miejsce po młynie między jez. Bełczak a jez. Główka;
- „**Ostrowite**” – łąka na wschodnim brzegu Jez. Ostrowite; nazwa prymarna topograficzna od słowa „*ostrowite*”, dziś zaginiona;
- „**Piła Młyn**” – nazwa osady młyńskiej w której był tartak czyli **piła do drewna** (nie istnieje) między jez. Skrzyńka a jez. Plesno;

**Figure S1.** Protection Plan of the Tuchola Forests National Park, which are unpublished documents of the National Park Directorate approved by the State Administration. The document in Polish is available in the library Tuchola Forests National Park.

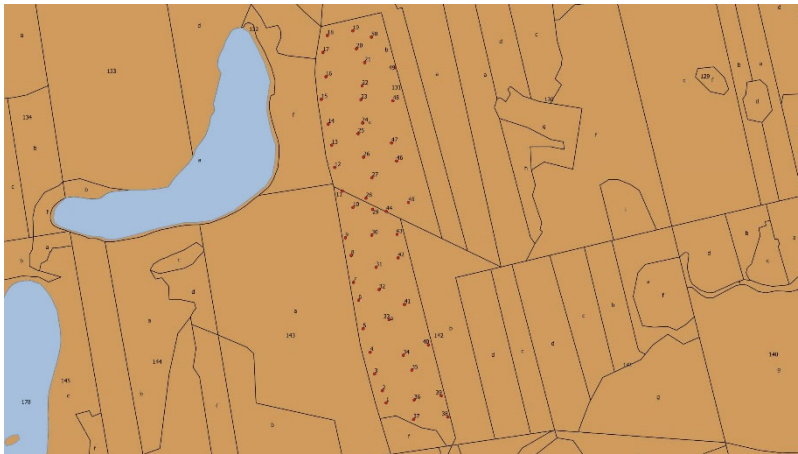

**Figure S2.** Location of sample trees in the stand GAC.

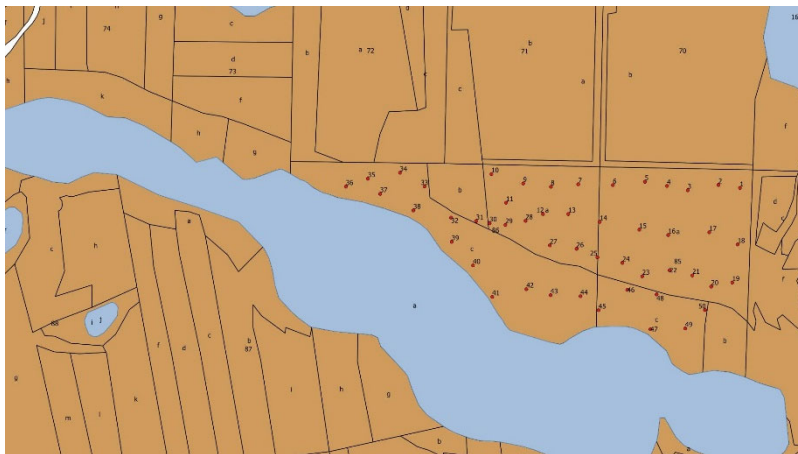

**Figure S3.** Location of sample trees in the stand PLE.

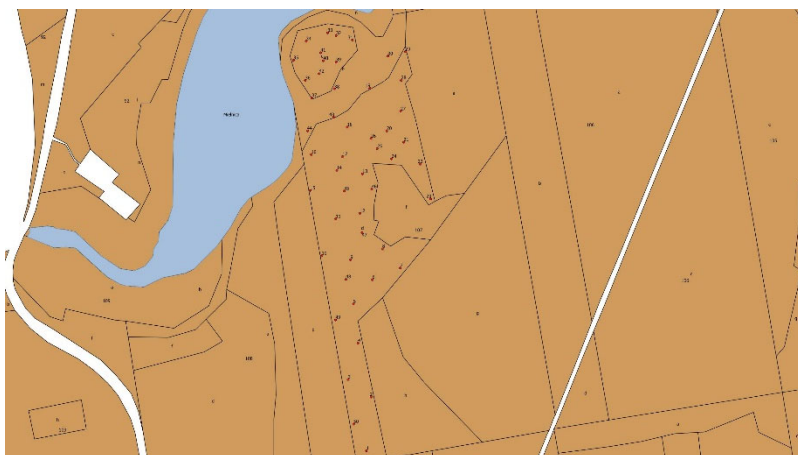

**Figure S4.** Location of sample trees in the stand MIE.



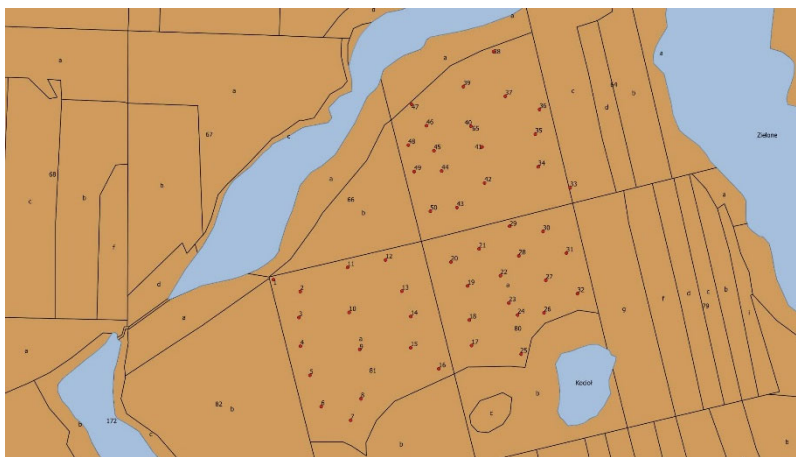

**Figure S5.** Location of sample trees in the stand KOC.
